# Supplementary material for: Comparison of the Effect of Phospholipid Extracts from Salmon and Silver Carp Heads on High-Fat-Diet-Induced Metabolic Syndrome in C57BL/6J Mice
Source: MDPI journal article supplement (doi:10.3390/md21070409), 2023-07-19
Supplement: s1 [file s1]

Table S1 Primer sequences for RT-qPCR amplification

| Gene          | Forward primer           | Reverse primer            |
|---------------|--------------------------|---------------------------|
| FAS           | TTGATGATTCAGGGAGTGGA     | AGCAGATGAGTTGTTCTTGGAC    |
| ME            | TCACCTGCCCTAATGTCCCT     | CATGCCGTTATCAACTTGTCC     |
| G6PDH         | GTTTGGCAGCGGCAACTAA      | GGCATCACCTGGTACAACCTC     |
| ACC           | GAGTGACTGCCGAAACATCTCTG  | GCAAGGAGGACAGAGTTTATCGTG  |
| PPAR $\alpha$ | GTACGGCAATGGCTTTATCA     | CAATCCCCTCCTGCAACTT       |
| CPT-1a        | CTCAGTGGGAGCGACTCTTCA    | GGCCTCTGTGGTACACGACAA     |
| CPT-2         | GCTCCGAGGCATTTGTCA       | CCCATCGCTGCTTCTTTG        |
| PPAR $\gamma$ | GTGATGGAAGACCACTCGC      | CCCACAGACTCGGCACTC        |
| IRS1          | TTGCTTGGCACAATGTAGAA     | GAGGATCGTCAATAGCGTAAC     |
| PI3K $\alpha$ | CCTCTCCTTATAAAGCTCCTGGAA | GATCACAATCAAGAAGCTGTCGTAA |
| Akt1          | ACACGATGTTGGCAAAGAA      | GTGCTGGAGGACAACGACT       |
| Akt2          | TTCTACAACCAGGACCACGAGC   | TGATGCTGAGGAAGAACCGATG    |
| GSK-3 $\beta$ | AACACCAACAAGGGAGCA       | GAGCGTGAGGAGGGATAA        |
| GYS2          | ATCAGGCTTCCTCTTCAGCA     | CCAGCTTGATAAGTTCAACA      |
| GLUT2         | CTGTCTGTGTCCAGCTTTGCA    | CAAGCCACCCACCAAAGAAC      |
| GAPDH         | CATCACTGCCACCCAGAAGACTG  | ATGCCAGTGAGCTTCCCGTTCAG   |

Table S2. PL Molecular species of SC-PLE determined by (ultrahigh-performance liquid chromatography-quadrupole-time-of light mass spectrometry) UHPLC-Q-TOF-MS.

| Molecular Species | RT (min) | m/z      | Precursors  | Contents/(nmol/g) |
|-------------------|----------|----------|-------------|-------------------|
| LPA 18:0          | 2.21     | 437.2645 | [M-H]-      | 3308.26           |
| LPA 18:1          | 1.66     | 435.2466 | [M-H]-      | 1493.15           |
| LPA 20:3          | 1.45     | 459.2459 | [M-H]-      | 96.80             |
| LPA 20:5          | 1.12     | 455.2160 | [M-H]-      | 399.99            |
| LPA 22:6          | 1.18     | 481.2368 | [M-H]-      | 2453.60           |
| LPC 14:0          | 1.76     | 526.3146 | [M+CH3COO]- | 4520.84           |
| LPC 15:0          | 2.13     | 540.3259 | [M+CH3COO]- | 2772.01           |
| LPC 16:0          | 2.46     | 554.3438 | [M+CH3COO]- | 66594.72          |
| LPC 17:0          | 2.74     | 568.3516 | [M+CH3COO]- | 3241.90           |
| LPC 17:1          | 2.31     | 566.3446 | [M+CH3COO]- | 2038.69           |
| LPC 18:0          | 3.09     | 582.3766 | [M+CH3COO]- | 15556.50          |
| LPC 18:1          | 2.56     | 580.3594 | [M+CH3COO]- | 12320.18          |
| LPC 18:2          | 2.18     | 578.3453 | [M+CH3COO]- | 3215.19           |
| LPC 18:3          | 1.73     | 576.3293 | [M+CH3COO]- | 2277.22           |
| LPC 18:4          | 1.42     | 574.3149 | [M+CH3COO]- | 320.19            |
| LPC 20:0          | 3.72     | 610.3990 | [M+CH3COO]- | 239.65            |
| LPC 20:1          | 3.15     | 608.3921 | [M+CH3COO]- | 1117.29           |
| LPC 20:2          | 2.75     | 606.3660 | [M+CH3COO]- | 537.73            |
| LPC 20:3          | 2.38     | 604.3613 | [M+CH3COO]- | 1099.25           |
| LPC 20:4          | 2.08     | 602.3429 | [M+CH3COO]- | 4078.62           |
| LPC 20:5          | 1.68     | 600.3339 | [M+CH3COO]- | 6579.32           |
| LPC 22:0          | 4.34     | 638.4308 | [M+CH3COO]- | 72.56             |
| LPC 22:1          | 3.77     | 636.4227 | [M+CH3COO]- | 231.49            |
| LPC 22:3          | 2.96     | 632.3856 | [M+CH3COO]- | 103.72            |
| LPC 22:5          | 2.38     | 628.3553 | [M+CH3COO]- | 3121.30           |
| LPC 22:6          | 2.03     | 626.3466 | [M+CH3COO]- | 12626.31          |
| LPC 24:0          | 5.03     | 666.4609 | [M+CH3COO]- | 129.54            |
| LPC 24:1          | 4.37     | 664.4493 | [M+CH3COO]- | 469.19            |
| LPE 14:0          | 1.63     | 424.2442 | [M-H]-      | 17.00             |
| LPE 16:0          | 2.32     | 452.2765 | [M-H]-      | 1012.65           |
| LPE 16:1          | 1.81     | 450.2569 | [M-H]-      | 126.94            |
| LPE 17:0          | 2.60     | 466.2923 | [M-H]-      | 196.15            |
| LPE 18:0          | 2.89     | 480.3051 | [M-H]-      | 1893.34           |
| LPE 18:1          | 2.46     | 478.2923 | [M-H]-      | 1261.22           |
| LPE 18:2          | 2.07     | 476.2751 | [M-H]-      | 137.59            |
| LPE 18:3          | 1.62     | 474.2632 | [M-H]-      | 38.54             |
| LPE 19:0          | 3.15     | 494.3205 | [M-H]-      | 92.98             |
| LPE 20:1          | 2.98     | 506.3191 | [M-H]-      | 142.45            |
| LPE 20:2          | 2.62     | 504.3075 | [M-H]-      | 56.33             |
| LPE 20:3          | 2.27     | 502.2936 | [M-H]-      | 105.25            |
| LPE 20:4          | 2.00     | 500.2755 | [M-H]-      | 566.01            |

|              |      |          |        |         |
|--------------|------|----------|--------|---------|
| LPE 20:5     | 1.57 | 498.2635 | [M-H]- | 341.78  |
| LPE 22:5     | 2.17 | 526.2913 | [M-H]- | 138.22  |
| LPE 22:5     | 2.29 | 526.2922 | [M-H]- | 573.52  |
| LPE 22:6     | 1.95 | 524.2863 | [M-H]- | 2469.72 |
| LPE 24:1     | 3.77 | 562.3878 | [M-H]- | 10.31   |
| LPE 26:1     | 4.37 | 590.4098 | [M-H]- | 19.55   |
| LPG 16:0     | 1.35 | 483.2687 | [M-H]- | 423.37  |
| LPG 18:0     | 2.04 | 511.3008 | [M-H]- | 132.67  |
| LPG 18:1     | 1.49 | 509.2861 | [M-H]- | 256.62  |
| LPG 18:2     | 1.13 | 507.2667 | [M-H]- | 23.01   |
| LPG 20:1     | 2.14 | 537.3194 | [M-H]- | 59.03   |
| LPG 22:5     | 1.34 | 557.2867 | [M-H]- | 65.01   |
| LPG 22:6     | 1.08 | 555.2730 | [M-H]- | 115.12  |
| LPI 18:2     | 1.12 | 595.2835 | [M-H]- | 38.98   |
| LPI 20:5     | 1.04 | 617.2740 | [M-H]- | 64.19   |
| LPS 16:0     | 1.27 | 496.2646 | [M-H]- | 1227.70 |
| LPS 17:0     | 1.57 | 510.2822 | [M-H]- | 859.63  |
| LPS 18:1     | 1.42 | 522.2833 | [M-H]- | 1561.55 |
| LPS 18:2     | 1.12 | 520.2672 | [M-H]- | 156.44  |
| LPS 19:0     | 2.25 | 538.3049 | [M-H]- | 392.40  |
| LPS 20:1     | 2.08 | 550.3082 | [M-H]- | 245.35  |
| LPS 20:3     | 1.24 | 546.2790 | [M-H]- | 198.85  |
| LPS 20:4     | 1.12 | 544.2689 | [M-H]- | 340.34  |
| LPS 22:4     | 1.43 | 572.2968 | [M-H]- | 410.81  |
| LPS 22:5     | 1.26 | 570.2800 | [M-H]- | 1918.05 |
| LPS 22:6     | 1.08 | 568.2690 | [M-H]- | 2019.80 |
| PA 16:0_18:1 | 4.34 | 673.4786 | [M-H]- | 546.23  |
| PA 16:1_18:1 | 4.10 | 671.4606 | [M-H]- | 224.92  |
| PA 18:1_18:1 | 4.40 | 699.4922 | [M-H]- | 415.24  |
| PA 18:1_18:2 | 4.17 | 697.4762 | [M-H]- | 210.02  |
| PA 16:0_20:4 | 4.04 | 695.4604 | [M-H]- | 553.58  |
| PA 16:0_20:5 | 3.85 | 693.4426 | [M-H]- | 463.52  |
| PA 17:0_20:4 | 4.20 | 709.4709 | [M-H]- | 175.66  |
| PA 17:0_20:5 | 4.00 | 707.4637 | [M-H]- | 128.23  |
| PA 18:0_20:3 | 4.53 | 725.5118 | [M-H]- | 203.95  |
| PA 18:0_20:4 | 4.37 | 723.4962 | [M-H]- | 1761.04 |
| PA 18:0_20:5 | 4.17 | 721.4770 | [M-H]- | 2109.89 |
| PA 16:0_22:6 | 3.98 | 719.4623 | [M-H]- | 1435.12 |
| PA 16:1_22:6 | 3.71 | 717.4453 | [M-H]- | 164.92  |
| PA 17:0_22:6 | 4.13 | 733.4760 | [M-H]- | 257.99  |
| PA 18:0_22:5 | 4.40 | 749.5072 | [M-H]- | 981.98  |
| PA 18:0_22:6 | 4.31 | 747.4948 | [M-H]- | 3272.34 |
| PA 18:1_22:6 | 4.01 | 745.4832 | [M-H]- | 455.40  |
| PA 20:4_20:4 | 3.79 | 743.4589 | [M-H]- | 199.00  |

|              |      |          |             |          |
|--------------|------|----------|-------------|----------|
| PA 20:4_20:5 | 3.61 | 741.4498 | [M-H]-      | 170.72   |
| PA 20:5_22:6 | 3.57 | 765.4448 | [M-H]-      | 129.82   |
| PA 20:4_22:5 | 3.87 | 769.4896 | [M-H]-      | 204.22   |
| PA 22:5_22:5 | 3.87 | 795.4995 | [M-H]-      | 476.09   |
| PA 22:6_22:6 | 3.71 | 791.4654 | [M-H]-      | 882.17   |
| PC 16:0_16:0 | 5.95 | 792.5757 | [M+CH3COO]- | 15261.96 |
| PC 16:0_17:0 | 6.33 | 806.5827 | [M+CH3COO]- | 3649.84  |
| PC 16:0_17:1 | 5.69 | 804.5696 | [M+CH3COO]- | 6937.07  |
| PC 16:1_17:1 | 5.17 | 802.5498 | [M+CH3COO]- | 1005.95  |
| PC 16:0_18:0 | 6.82 | 820.6068 | [M+CH3COO]- | 4010.28  |
| PC 16:0_18:1 | 6.01 | 818.5927 | [M+CH3COO]- | 71264.94 |
| PC 16:1_18:1 | 5.55 | 816.5749 | [M+CH3COO]- | 9079.34  |
| PC 16:0_18:3 | 5.16 | 814.5580 | [M+CH3COO]- | 2861.06  |
| PC 16:0_18:4 | 4.88 | 812.5461 | [M+CH3COO]- | 1258.09  |
| PC 16:0_19:0 | 7.30 | 834.6366 | [M+CH3COO]- | 941.10   |
| PC 17:0_18:1 | 6.46 | 832.6054 | [M+CH3COO]- | 8145.92  |
| PC 17:1_18:1 | 5.82 | 830.5847 | [M+CH3COO]- | 1529.74  |
| PC 15:0_20:5 | 4.78 | 824.5410 | [M+CH3COO]- | 682.71   |
| PC 18:0_18:1 | 6.87 | 846.6299 | [M+CH3COO]- | 26337.92 |
| PC 18:1_18:1 | 6.10 | 844.6022 | [M+CH3COO]- | 3489.85  |
| PC 16:0_20:4 | 5.36 | 840.5759 | [M+CH3COO]- | 12158.01 |
| PC 16:0_20:5 | 5.02 | 838.5565 | [M+CH3COO]- | 27261.98 |
| PC 19:0_18:1 | 7.37 | 860.6374 | [M+CH3COO]- | 1577.36  |
| PC 18:1_19:1 | 6.55 | 858.6235 | [M+CH3COO]- | 837.18   |
| PC 15:0_22:6 | 4.96 | 850.5557 | [M+CH3COO]- | 1453.87  |
| PC 18:0_20:3 | 6.45 | 870.6155 | [M+CH3COO]- | 935.85   |
| PC 16:0_22:4 | 5.86 | 868.6097 | [M+CH3COO]- | 1706.77  |
| PC 18:0_20:4 | 6.01 | 868.5986 | [M+CH3COO]- | 2069.77  |
| PC 16:0_22:5 | 5.44 | 866.5910 | [M+CH3COO]- | 5068.80  |
| PC 18:0_20:5 | 5.59 | 866.5908 | [M+CH3COO]- | 12633.05 |
| PC 16:0_22:6 | 5.22 | 864.5745 | [M+CH3COO]- | 24354.76 |
| PC 18:3_20:5 | 4.42 | 860.5432 | [M+CH3COO]- | 721.84   |
| PC 17:0_22:5 | 5.83 | 880.6003 | [M+CH3COO]- | 1033.74  |
| PC 17:0_22:6 | 5.47 | 878.5873 | [M+CH3COO]- | 2323.87  |
| PC 24:0_16:1 | 8.85 | 902.6836 | [M+CH3COO]- | 2949.97  |
| PC 16:1_24:1 | 7.86 | 900.6649 | [M+CH3COO]- | 2365.49  |
| PC 18:0_22:5 | 6.34 | 894.6130 | [M+CH3COO]- | 1339.37  |
| PC 18:0_22:6 | 5.83 | 892.6053 | [M+CH3COO]- | 5373.96  |
| PC 24:0_18:1 | 9.92 | 930.7189 | [M+CH3COO]- | 4193.31  |
| PC 20:5_22:6 | 4.49 | 910.5566 | [M+CH3COO]- | 708.11   |
| PC 18:1_24:1 | 8.80 | 928.6990 | [M+CH3COO]- | 9677.02  |
| PC 24:1_18:2 | 8.06 | 926.6840 | [M+CH3COO]- | 703.26   |
| PC 20:1_22:6 | 5.85 | 918.6251 | [M+CH3COO]- | 465.96   |
| PC 20:3_22:6 | 5.06 | 914.5856 | [M+CH3COO]- | 784.83   |

|                   |       |          |             |          |
|-------------------|-------|----------|-------------|----------|
| PC 26:0_18:1      | 11.19 | 958.7471 | [M+CH3COO]- | 829.66   |
| PC 18:1_26:1      | 9.89  | 956.7286 | [M+CH3COO]- | 3740.28  |
| PC 26:1_18:2      | 9.06  | 954.7031 | [M+CH3COO]- | 524.92   |
| PC 24:1_20:3      | 8.33  | 952.6973 | [M+CH3COO]- | 287.82   |
| PC 24:0_20:5      | 8.05  | 950.6872 | [M+CH3COO]- | 142.19   |
| PC 18:1_28:1      | 11.09 | 984.7576 | [M+CH3COO]- | 780.14   |
| PC O-16:0_16:0;3O | 5.85  | 826.5936 | [M+CH3COO]- | 5781.42  |
| PC O-16:0_16:1;3O | 5.44  | 824.5795 | [M+CH3COO]- | 10671.70 |
| PC O-17:0_16:1;3O | 5.66  | 838.5854 | [M+CH3COO]- | 1154.25  |
| PC O-16:0_18:0;3O | 6.49  | 854.6267 | [M+CH3COO]- | 940.54   |
| PC O-16:0_18:1;3O | 6.15  | 852.6082 | [M+CH3COO]- | 6675.05  |
| PC O-16:0_18:2;3O | 5.68  | 850.5930 | [M+CH3COO]- | 27017.35 |
| PC O-17:0_18:2;3O | 5.89  | 864.6104 | [M+CH3COO]- | 3331.43  |
| PC O-18:0_18:2;3O | 6.45  | 878.6247 | [M+CH3COO]- | 3525.32  |
| PC O-18:1_18:2;3O | 5.73  | 876.6036 | [M+CH3COO]- | 3443.01  |
| PC O-18:3_18:2;3O | 4.93  | 872.5781 | [M+CH3COO]- | 1437.01  |
| PE 16:0_16:1      | 4.93  | 688.4870 | [M-H]-      | 150.76   |
| PE 16:0_17:0      | 5.63  | 704.5206 | [M-H]-      | 157.44   |
| PE 15:0_18:1      | 5.17  | 702.5054 | [M-H]-      | 131.28   |
| PE 16:0_18:1      | 5.42  | 716.5223 | [M-H]-      | 1501.02  |
| PE 16:1_18:1      | 5.00  | 714.5049 | [M-H]-      | 310.00   |
| PE 16:1_18:2      | 4.72  | 712.4893 | [M-H]-      | 42.06    |
| PE 17:0_18:0      | 6.36  | 732.5558 | [M-H]-      | 174.16   |
| PE 17:0_18:1      | 5.68  | 730.5352 | [M-H]-      | 454.72   |
| PE 17:1_18:1      | 5.24  | 728.5150 | [M-H]-      | 107.03   |
| PE 18:0_18:0      | 6.82  | 746.5640 | [M-H]-      | 148.99   |
| PE 18:0_18:1      | 5.98  | 744.5537 | [M-H]-      | 4973.27  |
| PE 18:1_18:1      | 5.52  | 742.5387 | [M-H]-      | 1282.27  |
| PE 18:1_18:2      | 5.17  | 740.5193 | [M-H]-      | 317.67   |
| PE 16:0_20:4      | 4.96  | 738.5035 | [M-H]-      | 826.65   |
| PE 16:0_20:5      | 4.68  | 736.4954 | [M-H]-      | 482.00   |
| PE 17:0_20:1      | 6.48  | 758.5687 | [M-H]-      | 393.40   |
| PE 18:1_19:1      | 5.81  | 756.5423 | [M-H]-      | 115.82   |
| PE 17:0_20:4      | 5.20  | 752.5212 | [M-H]-      | 293.60   |
| PE 18:0_20:1      | 6.88  | 772.5836 | [M-H]-      | 846.38   |
| PE 18:1_20:1      | 6.05  | 770.5707 | [M-H]-      | 603.87   |
| PE 18:0_20:4      | 5.46  | 766.5369 | [M-H]-      | 4611.17  |
| PE 18:1_20:4      | 5.02  | 764.5202 | [M-H]-      | 1819.41  |
| PE 16:0_22:6      | 4.86  | 762.5057 | [M-H]-      | 1277.18  |
| PE 18:1_20:5      | 4.74  | 762.5126 | [M-H]-      | 386.47   |
| PE 19:0_20:5      | 5.39  | 778.5287 | [M-H]-      | 444.17   |
| PE 17:0_22:6      | 5.06  | 776.5226 | [M-H]-      | 415.32   |
| PE 22:0_18:1      | 7.19  | 800.6088 | [M-H]-      | 48.49    |
| PE 18:1_22:1      | 6.60  | 798.5944 | [M-H]-      | 73.03    |

|                |      |          |        |         |
|----------------|------|----------|--------|---------|
| PE 18:0_22:4   | 5.86 | 794.5664 | [M-H]- | 564.92  |
| PE 18:0_22:5   | 5.68 | 792.5501 | [M-H]- | 2355.14 |
| PE 18:0_22:6   | 5.35 | 790.5381 | [M-H]- | 5880.99 |
| PE 18:1_22:5   | 5.22 | 790.5488 | [M-H]- | 877.92  |
| PE 18:1_22:6   | 4.91 | 788.5240 | [M-H]- | 913.92  |
| PE 18:2_22:6   | 4.59 | 786.5014 | [M-H]- | 142.07  |
| PE 20:4_20:5   | 4.33 | 784.4897 | [M-H]- | 66.04   |
| PE 19:1_22:6   | 5.17 | 802.5413 | [M-H]- | 167.66  |
| PE 20:5_22:6   | 3.23 | 808.4915 | [M-H]- | 35.73   |
| PE 18:1_24:1   | 7.21 | 826.6301 | [M-H]- | 87.69   |
| PE 20:3_22:5   | 5.00 | 814.5382 | [M-H]- | 201.39  |
| PE 20:4_22:5   | 4.71 | 812.5217 | [M-H]- | 180.01  |
| PE 22:6_22:6   | 4.42 | 834.5081 | [M-H]- | 307.69  |
| PE O-16:1_14:0 | 5.13 | 646.4767 | [M-H]- | 49.78   |
| PE O-16:1_15:0 | 5.37 | 660.4943 | [M-H]- | 64.82   |
| PE O-16:0_16:0 | 5.86 | 676.5255 | [M-H]- | 51.42   |
| PE O-16:1_16:0 | 5.66 | 674.5118 | [M-H]- | 386.21  |
| PE O-16:1_16:1 | 5.20 | 672.4974 | [M-H]- | 843.01  |
| PE O-18:2_14:1 | 4.80 | 670.4715 | [M-H]- | 23.99   |
| PE O-16:1_17:0 | 5.86 | 688.5226 | [M-H]- | 271.97  |
| PE O-16:1_17:1 | 5.46 | 686.5120 | [M-H]- | 771.23  |
| PE O-18:2_15:1 | 5.04 | 684.4962 | [M-H]- | 37.84   |
| PE O-18:0_16:0 | 6.70 | 704.5617 | [M-H]- | 144.41  |
| PE O-18:1_16:0 | 6.24 | 702.5430 | [M-H]- | 606.77  |
| PE O-16:1_18:1 | 5.72 | 700.5262 | [M-H]- | 6307.57 |
| PE O-18:2_16:1 | 5.27 | 698.5123 | [M-H]- | 1037.70 |
| PE O-16:1_18:3 | 4.99 | 696.4864 | [M-H]- | 82.57   |
| PE O-17:1_18:1 | 6.01 | 714.5424 | [M-H]- | 1175.70 |
| PE O-18:2_17:1 | 5.53 | 712.5267 | [M-H]- | 495.29  |
| PE O-15:1_20:4 | 4.97 | 708.4913 | [M-H]- | 95.46   |
| PE O-18:0_18:1 | 6.72 | 730.5718 | [M-H]- | 627.90  |
| PE O-18:1_18:1 | 6.30 | 728.5576 | [M-H]- | 4805.83 |
| PE O-18:2_18:1 | 5.79 | 726.5406 | [M-H]- | 4350.49 |
| PE O-18:3_18:1 | 5.40 | 724.5175 | [M-H]- | 408.93  |
| PE O-16:1_20:4 | 5.22 | 722.5140 | [M-H]- | 2714.78 |
| PE O-16:1_20:5 | 4.91 | 720.4954 | [M-H]- | 778.70  |
| PE O-14:1_22:6 | 4.63 | 718.4792 | [M-H]- | 50.40   |
| PE O-19:1_18:1 | 6.54 | 742.5734 | [M-H]- | 187.94  |
| PE O-19:2_18:1 | 6.05 | 740.5569 | [M-H]- | 158.50  |
| PE O-17:1_20:4 | 5.42 | 736.5261 | [M-H]- | 817.81  |
| PE O-17:1_20:5 | 5.06 | 734.5074 | [M-H]- | 385.38  |
| PE O-15:1_22:6 | 4.86 | 732.4874 | [M-H]- | 126.37  |
| PE O-18:1_20:1 | 6.91 | 756.5873 | [M-H]- | 266.37  |
| PE O-18:2_20:1 | 6.36 | 754.5696 | [M-H]- | 245.40  |

|                |      |          |        |         |
|----------------|------|----------|--------|---------|
| PE O-18:0_20:4 | 5.86 | 752.5558 | [M-H]- | 528.35  |
| PE O-18:1_20:4 | 5.75 | 750.5422 | [M-H]- | 2086.41 |
| PE O-16:1_22:5 | 5.26 | 748.5280 | [M-H]- | 3108.53 |
| PE O-16:1_22:6 | 5.09 | 746.5143 | [M-H]- | 5111.33 |
| PE O-16:2_22:6 | 4.71 | 744.4929 | [M-H]- | 120.34  |
| PE O-19:1_20:4 | 5.91 | 764.5544 | [M-H]- | 282.72  |
| PE O-17:1_22:5 | 5.44 | 762.5435 | [M-H]- | 357.74  |
| PE O-17:2_22:6 | 4.93 | 758.5032 | [M-H]- | 59.18   |
| PE O-18:4_22:6 | 4.52 | 768.5017 | [M-H]- | 55.50   |
| PE O-18:1_22:5 | 5.97 | 776.5647 | [M-H]- | 2266.92 |
| PE O-18:1_22:6 | 5.60 | 774.5460 | [M-H]- | 4399.33 |
| PE O-18:2_22:6 | 5.16 | 772.5307 | [M-H]- | 1598.65 |
| PE O-18:3_22:6 | 4.80 | 770.5105 | [M-H]- | 152.68  |
| PE O-19:1_22:6 | 5.85 | 788.5548 | [M-H]- | 346.68  |
| PE O-19:2_22:6 | 5.39 | 786.5376 | [M-H]- | 90.18   |
| PE O-20:4_22:6 | 4.91 | 796.5444 | [M-H]- | 120.62  |
| PE O-20:1_22:6 | 5.76 | 802.5699 | [M-H]- | 175.11  |
| PG 16:0_18:1   | 4.09 | 747.5131 | [M-H]- | 228.47  |
| PG 16:1_18:1   | 3.88 | 745.4954 | [M-H]- | 30.69   |
| PG 18:0_18:1   | 4.39 | 775.5450 | [M-H]- | 101.58  |
| PG 18:1_18:1   | 4.15 | 773.5308 | [M-H]- | 80.50   |
| PG 16:0_20:3   | 3.97 | 771.5155 | [M-H]- | 82.41   |
| PG 18:1_18:3   | 3.75 | 769.4960 | [M-H]- | 36.72   |
| PG 18:0_20:2   | 4.43 | 801.5626 | [M-H]- | 14.61   |
| PG 18:1_20:2   | 4.24 | 799.5449 | [M-H]- | 28.89   |
| PG 16:0_22:6   | 3.81 | 793.5018 | [M-H]- | 51.10   |
| PG 18:3_20:4   | 3.55 | 791.4789 | [M-H]- | 12.93   |
| PG 18:3_20:5   | 3.33 | 789.4758 | [M-H]- | 5.50    |
| PG 18:1_22:6   | 3.85 | 819.5136 | [M-H]- | 32.13   |
| PG 18:3_22:5   | 3.54 | 817.4931 | [M-H]- | 8.37    |
| PG 18:3_22:6   | 3.47 | 815.4818 | [M-H]- | 9.37    |
| PG 20:4_22:6   | 3.53 | 841.4950 | [M-H]- | 21.18   |
| PG 20:5_22:6   | 3.31 | 839.4935 | [M-H]- | 5.68    |
| PG 20:1_22:6   | 3.98 | 847.5376 | [M-H]- | 31.05   |
| PG 20:3_22:5   | 3.77 | 845.5225 | [M-H]- | 15.05   |
| PG 22:5_22:6   | 3.63 | 867.5137 | [M-H]- | 71.97   |
| PG 22:6_22:6   | 3.46 | 865.5025 | [M-H]- | 55.27   |
| PI 16:0_16:1   | 3.82 | 807.4940 | [M-H]- | 448.42  |
| PI 16:0_18:1   | 4.14 | 835.5364 | [M-H]- | 1023.31 |
| PI 18:0_18:3   | 3.91 | 859.5309 | [M-H]- | 135.73  |
| PI 16:0_20:4   | 3.79 | 857.5211 | [M-H]- | 1730.84 |
| PI 16:1_20:4   | 3.60 | 855.4996 | [M-H]- | 632.49  |
| PI 17:0_20:4   | 3.94 | 871.5323 | [M-H]- | 1059.52 |
| PI 17:0_20:5   | 3.74 | 869.5179 | [M-H]- | 274.55  |

|                |      |          |                    |          |
|----------------|------|----------|--------------------|----------|
| PI 18:0_20:4   | 4.07 | 885.5524 | [M-H]-             | 18567.74 |
| PI 18:0_20:5   | 3.88 | 883.5356 | [M-H]-             | 6428.56  |
| PI 18:1_20:5   | 3.66 | 881.5176 | [M-H]-             | 1037.99  |
| PI 18:3_20:4   | 3.44 | 879.4960 | [M-H]-             | 83.63    |
| PI 19:0_20:4   | 4.20 | 899.5694 | [M-H]-             | 702.49   |
| PI 19:1_20:4   | 3.98 | 897.5482 | [M-H]-             | 269.91   |
| PI 17:0_22:6   | 3.85 | 895.5305 | [M-H]-             | 161.59   |
| PI 18:0_22:5   | 4.11 | 911.5634 | [M-H]-             | 397.24   |
| PI 18:0_22:6   | 4.01 | 909.5460 | [M-H]-             | 954.87   |
| PI 18:1_22:6   | 3.77 | 907.5294 | [M-H]-             | 263.31   |
| PI 20:4_20:4   | 3.55 | 905.5186 | [M-H]-             | 150.32   |
| PI 20:4_22:5   | 3.65 | 931.5289 | [M-H]-             | 50.82    |
| PS 16:0_16:1   | 3.85 | 732.4840 | [M-H]-             | 99.86    |
| PS 16:0_18:1   | 4.15 | 760.5121 | [M-H]-             | 626.38   |
| PS 16:0_18:2   | 3.93 | 758.4878 | [M-H]-             | 94.31    |
| PS 18:0_17:1   | 4.31 | 774.5278 | [M-H]-             | 315.40   |
| PS 18:0_18:1   | 4.49 | 788.5400 | [M-H]-             | 1153.65  |
| PS 18:1_18:1   | 4.23 | 786.5256 | [M-H]-             | 526.57   |
| PS 16:0_20:3   | 4.00 | 784.5099 | [M-H]-             | 124.39   |
| PS 16:0_20:4   | 3.88 | 782.4926 | [M-H]-             | 224.97   |
| PS 19:0_18:1   | 4.74 | 802.5540 | [M-H]-             | 87.26    |
| PS 18:0_20:3   | 4.34 | 812.5427 | [M-H]-             | 286.53   |
| PS 18:0_20:4   | 4.18 | 810.5260 | [M-H]-             | 974.45   |
| PS 18:1_20:4   | 4.00 | 808.5203 | [M-H]-             | 915.57   |
| PS 16:1_22:6   | 3.57 | 804.4780 | [M-H]-             | 38.47    |
| PS 17:0_22:6   | 3.97 | 820.5065 | [M-H]-             | 264.17   |
| PS 18:1_22:6   | 3.88 | 832.5073 | [M-H]-             | 202.03   |
| PS 22:6_22:6   | 3.57 | 878.4971 | [M-H]-             | 401.27   |
| PE P-16:0_14:0 | 5.11 | 648.4909 | [M+H] <sup>+</sup> | 51.25    |
| PE P-14:0_16:1 | 4.70 | 646.4683 | [M+H] <sup>+</sup> | 20.98    |
| PE P-16:0_15:1 | 5.02 | 660.4854 | [M+H] <sup>+</sup> | 74.43    |
| PE P-16:0_16:0 | 5.62 | 676.5159 | [M+H] <sup>+</sup> | 168.83   |
| PE P-16:0_17:1 | 5.44 | 688.5140 | [M+H] <sup>+</sup> | 308.36   |
| PE P-17:1_16:1 | 5.04 | 686.5071 | [M+H] <sup>+</sup> | 45.17    |
| PE P-16:0_18:1 | 5.71 | 702.5317 | [M+H] <sup>+</sup> | 2001.43  |
| PE P-14:0_20:5 | 4.44 | 694.4667 | [M+H] <sup>+</sup> | 33.20    |
| PE P-18:1_17:1 | 5.49 | 714.5358 | [M+H] <sup>+</sup> | 242.00   |
| PE P-15:0_20:4 | 4.95 | 710.5044 | [M+H] <sup>+</sup> | 180.86   |
| PE P-18:0_18:1 | 6.28 | 730.5637 | [M+H] <sup>+</sup> | 1621.36  |
| PE P-18:1_18:1 | 5.75 | 728.5488 | [M+H] <sup>+</sup> | 1456.33  |
| PE P-18:1_18:2 | 5.35 | 726.5364 | [M+H] <sup>+</sup> | 259.95   |
| PE P-16:0_20:4 | 5.18 | 724.5169 | [M+H] <sup>+</sup> | 1114.76  |
| PE P-16:0_20:5 | 4.88 | 722.5057 | [M+H] <sup>+</sup> | 1171.89  |
| PE P-14:0_22:6 | 4.61 | 720.4899 | [M+H] <sup>+</sup> | 139.02   |



---

|                |      |          |                    |         |
|----------------|------|----------|--------------------|---------|
| PE P-17:0_20:4 | 5.38 | 738.5336 | [M+H] <sup>+</sup> | 335.17  |
| PE P-17:0_20:5 | 5.05 | 736.5225 | [M+H] <sup>+</sup> | 331.95  |
| PE P-15:0_22:6 | 4.83 | 734.5082 | [M+H] <sup>+</sup> | 226.87  |
| PE P-18:1_20:1 | 6.30 | 756.5807 | [M+H] <sup>+</sup> | 357.84  |
| PE P-18:0_20:4 | 5.72 | 752.5516 | [M+H] <sup>+</sup> | 684.48  |
| PE P-16:0_22:5 | 5.24 | 750.5324 | [M+H] <sup>+</sup> | 812.19  |
| PE P-16:0_22:6 | 5.08 | 748.5215 | [M+H] <sup>+</sup> | 3587.13 |
| PE P-16:1_22:6 | 4.61 | 746.5040 | [M+H] <sup>+</sup> | 332.24  |
| PE P-17:0_22:6 | 5.27 | 762.5386 | [M+H] <sup>+</sup> | 582.64  |
| PE P-17:1_22:6 | 4.89 | 760.5205 | [M+H] <sup>+</sup> | 126.31  |
| PE P-18:0_22:6 | 5.58 | 776.5545 | [M+H] <sup>+</sup> | 1065.77 |
| PE P-18:1_22:6 | 5.12 | 774.5372 | [M+H] <sup>+</sup> | 1166.38 |
| PE P-18:2_22:6 | 4.79 | 772.5206 | [M+H] <sup>+</sup> | 287.33  |
| PE P-18:3_22:6 | 4.50 | 770.5032 | [M+H] <sup>+</sup> | 208.77  |

---

Table S3. PL Molecular species of S-PLE determined by (ultrahigh-performance liquid chromatography-quadrupole-time-of light mass spectrometry) UHPLC-Q-TOF-MS.

| Molecular Species | RT (min) | m/z      | Precursors  | Contents/(nmol/g) |
|-------------------|----------|----------|-------------|-------------------|
| LPA 18:2          | 2.21     | 433.2300 | [M-H]-      | 76.61             |
| LPA 20:5          | 1.68     | 455.2204 | [M-H]-      | 69.65             |
| LPA 22:6          | 1.16     | 481.2344 | [M-H]-      | 790.84            |
| LPC 14:0          | 1.77     | 526.3149 | [M+CH3COO]- | 2098.19           |
| LPC 16:0          | 2.48     | 554.3458 | [M+CH3COO]- | 20033.75          |
| LPC 18:0          | 3.09     | 582.3763 | [M+CH3COO]- | 3375.09           |
| LPC 18:1          | 2.55     | 580.3614 | [M+CH3COO]- | 10249.71          |
| LPC 18:2          | 2.19     | 578.3398 | [M+CH3COO]- | 3360.88           |
| LPC 18:3          | 1.74     | 576.3292 | [M+CH3COO]- | 1070.33           |
| LPC 18:4          | 1.42     | 574.3089 | [M+CH3COO]- | 270.12            |
| LPC 20:0          | 3.72     | 610.3994 | [M+CH3COO]- | 87.52             |
| LPC 20:1          | 3.15     | 608.3893 | [M+CH3COO]- | 325.75            |
| LPC 20:3          | 2.39     | 604.3613 | [M+CH3COO]- | 668.54            |
| LPC 20:4          | 2.12     | 602.3474 | [M+CH3COO]- | 1735.14           |
| LPC 20:5          | 1.68     | 600.3303 | [M+CH3COO]- | 13449.97          |
| LPC 22:5          | 2.23     | 628.3563 | [M+CH3COO]- | 5995.20           |
| LPC 22:6          | 2.03     | 626.3451 | [M+CH3COO]- | 81840.42          |
| LPC 24:1          | 4.35     | 664.4512 | [M+CH3COO]- | 378.30            |
| LPE 14:0          | 1.63     | 424.2480 | [M-H]-      | 40.81             |
| LPE 16:0          | 2.33     | 452.2770 | [M-H]-      | 4664.71           |
| LPE 16:1          | 1.86     | 450.2532 | [M-H]-      | 53.59             |
| LPE 17:0          | 2.62     | 466.2870 | [M-H]-      | 185.38            |
| LPE 17:1          | 2.19     | 464.2734 | [M-H]-      | 165.96            |
| LPE 18:0          | 2.88     | 480.3075 | [M-H]-      | 4524.72           |
| LPE 18:1          | 2.46     | 478.2916 | [M-H]-      | 4767.13           |
| LPE 18:2          | 2.05     | 476.2775 | [M-H]-      | 770.79            |
| LPE 18:3          | 1.64     | 474.2601 | [M-H]-      | 111.35            |
| LPE 19:0          | 3.16     | 494.3239 | [M-H]-      | 65.64             |
| LPE 20:0          | 3.40     | 508.3358 | [M-H]-      | 76.54             |
| LPE 20:1          | 2.96     | 506.3188 | [M-H]-      | 277.80            |
| LPE 20:2          | 2.62     | 504.3045 | [M-H]-      | 289.36            |
| LPE 20:3          | 2.26     | 502.2889 | [M-H]-      | 273.51            |
| LPE 20:4          | 1.99     | 500.2744 | [M-H]-      | 559.80            |
| LPE 20:5          | 1.58     | 498.2612 | [M-H]-      | 991.96            |
| LPE 22:2          | 3.10     | 532.3354 | [M-H]-      | 18.89             |
| LPE 22:4          | 2.48     | 528.3011 | [M-H]-      | 117.25            |
| LPE 22:5          | 2.15     | 526.2930 | [M-H]-      | 1657.31           |
| LPE 22:6          | 1.92     | 524.2795 | [M-H]-      | 15600.17          |
| LPG 14:0          | 1.10     | 455.2395 | [M-H]-      | 42.41             |
| LPG 16:0          | 1.33     | 483.2716 | [M-H]-      | 2095.79           |
| LPG 18:0          | 2.03     | 511.2969 | [M-H]-      | 614.67            |

|              |      |          |             |           |
|--------------|------|----------|-------------|-----------|
| LPG 18:1     | 1.49 | 509.2874 | [M-H]-      | 3427.99   |
| LPG 18:2     | 1.12 | 507.2692 | [M-H]-      | 630.73    |
| LPG 20:1     | 2.15 | 537.3173 | [M-H]-      | 167.04    |
| LPG 20:4     | 1.10 | 531.2701 | [M-H]-      | 227.41    |
| LPG 20:5     | 0.90 | 529.2548 | [M-H]-      | 72.07     |
| LPG 22:5     | 1.19 | 557.2852 | [M-H]-      | 704.02    |
| LPG 22:6     | 1.09 | 555.2722 | [M-H]-      | 6412.68   |
| LPG 24:1     | 3.01 | 593.3796 | [M-H]-      | 171.12    |
| LPG O-16:0   | 1.65 | 469.2893 | [M-H]-      | 129.69    |
| LPG O-18:2   | 1.77 | 493.2897 | [M-H]-      | 203.92    |
| LPI 18:2     | 1.09 | 595.2872 | [M-H]-      | 108.68    |
| LPI 20:4     | 1.01 | 619.2910 | [M-H]-      | 413.78    |
| LPI 20:5     | 0.84 | 617.2741 | [M-H]-      | 83.77     |
| LPS 16:0     | 1.28 | 496.2672 | [M-H]-      | 478.17    |
| LPS 18:1     | 1.40 | 522.2808 | [M-H]-      | 1632.14   |
| LPS 18:2     | 1.15 | 520.2679 | [M-H]-      | 170.06    |
| LPS 20:1     | 2.08 | 550.3055 | [M-H]-      | 181.94    |
| LPS 20:3     | 1.24 | 546.2781 | [M-H]-      | 139.52    |
| LPS 20:4     | 1.12 | 544.2653 | [M-H]-      | 256.52    |
| LPS 20:5     | 0.87 | 542.2515 | [M-H]-      | 38.45     |
| LPS 22:5     | 1.24 | 570.2827 | [M-H]-      | 1575.62   |
| LPS 22:6     | 1.15 | 568.2687 | [M-H]-      | 7568.90   |
| PA 16:0_18:1 | 4.34 | 673.4770 | [M-H]-      | 239.42    |
| PA 16:0_18:2 | 4.08 | 671.4652 | [M-H]-      | 60.92     |
| PA 18:0_20:4 | 4.25 | 723.5005 | [M-H]-      | 81.71     |
| PA 16:0_22:6 | 3.83 | 719.4739 | [M-H]-      | 720.25    |
| PA 18:0_22:6 | 4.31 | 747.4926 | [M-H]-      | 1110.97   |
| PA 20:4_20:4 | 3.76 | 743.4545 | [M-H]-      | 205.36    |
| PC 16:0_16:0 | 5.93 | 792.5763 | [M+CH3COO]- | 3320.96   |
| PC 16:0_18:1 | 5.97 | 818.5922 | [M+CH3COO]- | 116692.23 |
| PC 16:0_18:2 | 5.56 | 816.5797 | [M+CH3COO]- | 12574.37  |
| PC 16:0_18:3 | 5.15 | 814.5574 | [M+CH3COO]- | 1202.78   |
| PC 17:0_18:1 | 6.54 | 832.6074 | [M+CH3COO]- | 1973.15   |
| PC 18:0_18:1 | 6.87 | 846.6245 | [M+CH3COO]- | 26892.99  |
| PC 18:1_18:1 | 6.11 | 844.6060 | [M+CH3COO]- | 8127.47   |
| PC 18:1_18:2 | 5.61 | 842.5929 | [M+CH3COO]- | 4477.87   |
| PC 18:1_18:3 | 5.17 | 840.5740 | [M+CH3COO]- | 1467.17   |
| PC 16:0_20:5 | 5.03 | 838.5645 | [M+CH3COO]- | 17850.60  |
| PC 19:0_18:1 | 7.37 | 860.6387 | [M+CH3COO]- | 479.56    |
| PC 15:0_22:6 | 4.98 | 850.5586 | [M+CH3COO]- | 276.62    |
| PC 18:1_20:2 | 6.33 | 870.6156 | [M+CH3COO]- | 835.02    |
| PC 16:0_22:5 | 5.46 | 866.5967 | [M+CH3COO]- | 4996.41   |
| PC 18:0_20:5 | 5.61 | 866.5914 | [M+CH3COO]- | 4912.19   |
| PC 16:0_22:6 | 5.21 | 864.5740 | [M+CH3COO]- | 53808.04  |

|                   |      |          |             |          |
|-------------------|------|----------|-------------|----------|
| PC 17:0_22:6      | 5.55 | 878.5912 | [M+CH3COO]- | 332.07   |
| PC 22:0_18:1      | 8.82 | 902.6841 | [M+CH3COO]- | 938.08   |
| PC 18:1_22:1      | 7.83 | 900.6726 | [M+CH3COO]- | 2356.97  |
| PC 18:1_22:2      | 7.14 | 898.6517 | [M+CH3COO]- | 699.09   |
| PC 18:0_22:5      | 6.16 | 894.6140 | [M+CH3COO]- | 506.58   |
| PC 18:0_22:6      | 5.85 | 892.6071 | [M+CH3COO]- | 3284.05  |
| PC 18:2_22:6      | 4.91 | 888.5767 | [M+CH3COO]- | 2523.11  |
| PC 23:0_18:1      | 9.42 | 916.6964 | [M+CH3COO]- | 301.28   |
| PC 18:1_23:1      | 8.34 | 914.6857 | [M+CH3COO]- | 498.81   |
| PC 24:0_18:1      | 9.94 | 930.7206 | [M+CH3COO]- | 2611.57  |
| PC 20:5_22:6      | 4.48 | 910.5539 | [M+CH3COO]- | 2029.12  |
| PC 18:1_24:1      | 8.69 | 928.6996 | [M+CH3COO]- | 33439.01 |
| PC 18:2_24:2      | 7.35 | 924.6635 | [M+CH3COO]- | 688.22   |
| PC 22:0_20:5      | 7.15 | 922.6484 | [M+CH3COO]- | 332.83   |
| PC 22:1_20:5      | 6.37 | 920.6316 | [M+CH3COO]- | 232.66   |
| PC 20:1_22:6      | 5.85 | 918.6214 | [M+CH3COO]- | 264.66   |
| PC 22:5_22:6      | 4.85 | 938.5799 | [M+CH3COO]- | 568.09   |
| PC 22:6_22:6      | 4.67 | 936.5760 | [M+CH3COO]- | 3098.45  |
| PC 18:1_26:1      | 9.86 | 956.7296 | [M+CH3COO]- | 2901.00  |
| PC 18:1_26:2      | 9.02 | 954.7147 | [M+CH3COO]- | 1039.19  |
| PC 24:1_20:3      | 8.24 | 952.6949 | [M+CH3COO]- | 481.92   |
| PC 24:0_20:5      | 8.07 | 950.6867 | [M+CH3COO]- | 729.49   |
| PC 24:1_20:4      | 7.68 | 950.6816 | [M+CH3COO]- | 394.82   |
| PC 24:1_20:5      | 7.14 | 948.6682 | [M+CH3COO]- | 2792.92  |
| PC 22:1_22:6      | 6.63 | 946.6545 | [M+CH3COO]- | 321.21   |
| PC 24:1_22:5      | 7.79 | 976.6980 | [M+CH3COO]- | 569.26   |
| PC 24:1_22:6      | 7.40 | 974.6873 | [M+CH3COO]- | 1925.88  |
| PC O-16:0_16:1;3O | 5.46 | 824.5770 | [M+CH3COO]- | 2159.54  |
| PC O-16:0_18:2;3O | 5.69 | 850.5958 | [M+CH3COO]- | 20039.21 |
| PC O-18:1_18:2;3O | 5.76 | 876.6057 | [M+CH3COO]- | 2217.40  |
| PE 16:0_16:0      | 5.35 | 690.5051 | [M-H]-      | 169.47   |
| PE 14:0_18:1      | 4.92 | 688.4900 | [M-H]-      | 194.97   |
| PE 16:0_18:1      | 5.40 | 716.5203 | [M-H]-      | 4471.86  |
| PE 16:0_18:2      | 5.03 | 714.5051 | [M-H]-      | 780.69   |
| PE 16:0_18:3      | 4.73 | 712.4864 | [M-H]-      | 107.34   |
| PE 14:0_20:4      | 4.51 | 710.4673 | [M-H]-      | 19.49    |
| PE 18:0_17:1      | 5.71 | 730.5356 | [M-H]-      | 432.51   |
| PE 17:1_18:1      | 5.25 | 728.5197 | [M-H]-      | 324.84   |
| PE 17:1_18:2      | 4.90 | 726.5030 | [M-H]-      | 87.71    |
| PE 18:0_18:1      | 5.96 | 744.5580 | [M-H]-      | 14889.87 |
| PE 18:1_18:1      | 5.48 | 742.5372 | [M-H]-      | 8738.53  |
| PE 18:1_18:2      | 5.10 | 740.5214 | [M-H]-      | 1436.47  |
| PE 16:0_20:4      | 4.95 | 738.5041 | [M-H]-      | 901.23   |
| PE 16:0_20:5      | 4.67 | 736.4937 | [M-H]-      | 2156.65  |

|                |      |          |        |          |
|----------------|------|----------|--------|----------|
| PE 14:0_22:6   | 4.42 | 734.4711 | [M-H]- | 117.22   |
| PE 18:0_19:1   | 6.54 | 758.5656 | [M-H]- | 130.47   |
| PE 18:1_19:1   | 5.82 | 756.5562 | [M-H]- | 81.84    |
| PE 18:1_20:1   | 6.00 | 770.5707 | [M-H]- | 3526.43  |
| PE 18:1_20:2   | 5.58 | 768.5526 | [M-H]- | 1963.16  |
| PE 18:0_20:4   | 5.45 | 766.5380 | [M-H]- | 4260.05  |
| PE 18:0_20:5   | 5.12 | 764.5214 | [M-H]- | 4380.37  |
| PE 18:1_20:4   | 5.01 | 764.5211 | [M-H]- | 3918.64  |
| PE 16:0_22:6   | 4.85 | 762.5101 | [M-H]- | 21078.32 |
| PE 18:2_20:5   | 4.42 | 760.4913 | [M-H]- | 487.45   |
| PE 17:0_22:6   | 5.08 | 776.5198 | [M-H]- | 441.70   |
| PE 18:0_22:1   | 7.15 | 800.6124 | [M-H]- | 50.57    |
| PE 18:1_22:1   | 6.59 | 798.5992 | [M-H]- | 160.05   |
| PE 18:1_22:2   | 6.10 | 796.5765 | [M-H]- | 248.16   |
| PE 18:0_22:4   | 5.87 | 794.5646 | [M-H]- | 417.14   |
| PE 18:0_22:5   | 5.49 | 792.5572 | [M-H]- | 3271.43  |
| PE 18:0_22:6   | 5.33 | 790.5388 | [M-H]- | 22340.94 |
| PE 18:1_22:6   | 4.91 | 788.5237 | [M-H]- | 10078.83 |
| PE 18:2_22:6   | 4.59 | 786.5101 | [M-H]- | 2923.31  |
| PE 18:3_22:6   | 4.32 | 784.4842 | [M-H]- | 457.22   |
| PE 20:5_20:5   | 4.12 | 782.4785 | [M-H]- | 61.50    |
| PE 19:0_22:6   | 5.59 | 804.5564 | [M-H]- | 254.99   |
| PE 19:1_22:6   | 5.12 | 802.5320 | [M-H]- | 85.58    |
| PE 18:1_24:1   | 7.18 | 826.6336 | [M-H]- | 588.20   |
| PE 18:1_24:2   | 6.69 | 824.6163 | [M-H]- | 268.46   |
| PE 20:2_22:6   | 5.00 | 814.5392 | [M-H]- | 685.53   |
| PE 20:3_22:6   | 4.70 | 812.5246 | [M-H]- | 783.79   |
| PE 20:4_22:6   | 4.42 | 810.5088 | [M-H]- | 609.48   |
| PE 20:5_22:6   | 4.27 | 808.4918 | [M-H]- | 725.64   |
| PE 22:5_22:6   | 4.56 | 836.5235 | [M-H]- | 1651.64  |
| PE 22:6_22:6   | 4.42 | 834.5072 | [M-H]- | 2378.80  |
| PE 24:1_20:3   | 7.35 | 850.6274 | [M-H]- | 83.15    |
| PE O-16:1_16:0 | 5.65 | 674.5074 | [M-H]- | 122.67   |
| PE O-16:1_16:1 | 5.21 | 672.4941 | [M-H]- | 444.25   |
| PE O-16:1_17:1 | 5.49 | 686.5055 | [M-H]- | 332.95   |
| PE O-18:1_16:0 | 6.23 | 702.5439 | [M-H]- | 290.10   |
| PE O-16:1_18:1 | 5.71 | 700.5267 | [M-H]- | 9414.88  |
| PE O-18:2_16:1 | 5.28 | 698.5125 | [M-H]- | 2237.06  |
| PE O-16:1_18:3 | 4.98 | 696.4976 | [M-H]- | 189.06   |
| PE O-18:1_17:1 | 6.04 | 714.5447 | [M-H]- | 1040.01  |
| PE O-18:2_17:1 | 5.55 | 712.5299 | [M-H]- | 1271.25  |
| PE O-18:0_18:1 | 6.75 | 730.5728 | [M-H]- | 736.88   |
| PE O-18:1_18:1 | 6.30 | 728.5608 | [M-H]- | 12341.23 |
| PE O-18:2_18:1 | 5.78 | 726.5430 | [M-H]- | 23402.21 |

|                |      |          |        |          |
|----------------|------|----------|--------|----------|
| PE O-18:3_18:1 | 5.38 | 724.5247 | [M-H]- | 3351.68  |
| PE O-16:1_20:4 | 5.21 | 722.5137 | [M-H]- | 1106.55  |
| PE O-16:1_20:5 | 4.90 | 720.4927 | [M-H]- | 1331.11  |
| PE O-14:1_22:6 | 4.64 | 718.4802 | [M-H]- | 34.66    |
| PE O-19:2_18:1 | 6.06 | 740.5543 | [M-H]- | 197.63   |
| PE O-17:1_20:4 | 5.46 | 736.5198 | [M-H]- | 80.74    |
| PE O-17:1_20:5 | 5.11 | 734.5032 | [M-H]- | 127.49   |
| PE O-15:1_22:6 | 4.85 | 732.4880 | [M-H]- | 62.85    |
| PE O-20:0_18:1 | 7.71 | 758.5966 | [M-H]- | 110.23   |
| PE O-18:1_20:1 | 6.89 | 756.5923 | [M-H]- | 590.23   |
| PE O-18:2_20:1 | 6.34 | 754.5731 | [M-H]- | 793.12   |
| PE O-20:3_18:1 | 5.89 | 752.5543 | [M-H]- | 568.23   |
| PE O-18:1_20:4 | 5.73 | 750.5429 | [M-H]- | 1212.92  |
| PE O-18:2_20:4 | 5.26 | 748.5296 | [M-H]- | 6065.92  |
| PE O-18:2_20:5 | 4.95 | 746.5121 | [M-H]- | 3427.71  |
| PE O-18:3_20:5 | 4.62 | 744.4971 | [M-H]- | 216.66   |
| PE O-17:1_22:6 | 5.28 | 760.5168 | [M-H]- | 326.74   |
| PE O-17:2_22:6 | 4.91 | 758.5045 | [M-H]- | 28.92    |
| PE O-18:1_22:1 | 7.52 | 784.6169 | [M-H]- | 75.06    |
| PE O-18:2_22:1 | 6.95 | 782.6055 | [M-H]- | 229.73   |
| PE O-18:2_22:2 | 6.45 | 780.5869 | [M-H]- | 190.48   |
| PE O-18:0_22:6 | 5.69 | 776.5579 | [M-H]- | 3049.14  |
| PE O-18:1_22:6 | 5.61 | 774.5468 | [M-H]- | 2058.93  |
| PE O-18:2_22:5 | 5.31 | 774.5417 | [M-H]- | 1342.79  |
| PE O-18:2_22:6 | 5.15 | 772.5302 | [M-H]- | 12145.94 |
| PE O-18:3_22:6 | 4.80 | 770.5135 | [M-H]- | 539.65   |
| PG 14:0_16:0   | 3.77 | 693.4619 | [M-H]- | 35.74    |
| PG 14:0_16:1   | 3.54 | 691.4554 | [M-H]- | 10.93    |
| PG 14:0_18:2   | 3.60 | 717.4652 | [M-H]- | 18.33    |
| PG 15:0_18:1   | 3.95 | 733.4955 | [M-H]- | 28.15    |
| PG 16:0_18:1   | 4.08 | 747.5186 | [M-H]- | 2194.38  |
| PG 16:0_18:2   | 3.88 | 745.5023 | [M-H]- | 297.85   |
| PG 16:0_18:3   | 3.70 | 743.4830 | [M-H]- | 86.98    |
| PG 14:0_20:4   | 3.57 | 741.4695 | [M-H]- | 28.30    |
| PG 14:0_20:5   | 3.37 | 739.4510 | [M-H]- | 19.02    |
| PG 17:1_18:1   | 4.00 | 759.5191 | [M-H]- | 28.03    |
| PG 18:1_17:2   | 3.84 | 757.4971 | [M-H]- | 28.04    |
| PG 18:0_18:1   | 4.39 | 775.5450 | [M-H]- | 215.16   |
| PG 18:1_18:1   | 4.14 | 773.5311 | [M-H]- | 474.05   |
| PG 18:1_18:2   | 3.94 | 771.5162 | [M-H]- | 375.99   |
| PG 16:0_20:4   | 3.86 | 769.4964 | [M-H]- | 122.54   |
| PG 16:0_20:5   | 3.69 | 767.4876 | [M-H]- | 613.63   |
| PG 14:0_22:6   | 3.53 | 765.4662 | [M-H]- | 56.91    |
| PG 18:1_20:1   | 4.42 | 801.5617 | [M-H]- | 37.37    |

|              |      |          |        |          |
|--------------|------|----------|--------|----------|
| PG 18:0_20:4 | 4.14 | 797.5322 | [M-H]- | 88.19    |
| PG 18:0_20:5 | 3.95 | 795.5184 | [M-H]- | 321.87   |
| PG 16:0_22:6 | 3.81 | 793.4979 | [M-H]- | 1837.50  |
| PG 16:1_22:6 | 3.55 | 791.4869 | [M-H]- | 137.05   |
| PG 18:3_20:5 | 3.31 | 789.4649 | [M-H]- | 23.35    |
| PG 18:1_22:1 | 4.77 | 829.5984 | [M-H]- | 22.22    |
| PG 22:1_18:2 | 4.51 | 827.5771 | [M-H]- | 13.12    |
| PG 18:0_22:5 | 4.15 | 823.5331 | [M-H]- | 77.35    |
| PG 18:0_22:6 | 4.08 | 821.5311 | [M-H]- | 192.32   |
| PG 18:1_22:6 | 3.86 | 819.5164 | [M-H]- | 453.87   |
| PG 18:2_22:6 | 3.64 | 817.5017 | [M-H]- | 320.19   |
| PG 18:3_22:6 | 3.45 | 815.4860 | [M-H]- | 113.28   |
| PG 20:5_20:5 | 3.29 | 813.4722 | [M-H]- | 27.97    |
| PG 18:1_24:1 | 5.14 | 857.6246 | [M-H]- | 75.11    |
| PG 18:1_24:2 | 4.85 | 855.6108 | [M-H]- | 53.78    |
| PG 20:1_22:6 | 4.11 | 847.5403 | [M-H]- | 19.08    |
| PG 20:3_22:6 | 3.73 | 843.5082 | [M-H]- | 31.75    |
| PG 20:4_22:6 | 3.55 | 841.4974 | [M-H]- | 43.23    |
| PG 20:5_22:6 | 3.41 | 839.4857 | [M-H]- | 75.49    |
| PG 24:1_20:5 | 4.59 | 877.5942 | [M-H]- | 51.26    |
| PG 22:5_22:6 | 3.63 | 867.5130 | [M-H]- | 68.21    |
| PG 22:6_22:6 | 3.45 | 865.4977 | [M-H]- | 101.29   |
| PG 24:1_22:6 | 4.73 | 903.6112 | [M-H]- | 93.39    |
| PI 18:0_18:1 | 4.32 | 863.5532 | [M-H]- | 451.50   |
| PI 18:0_18:2 | 4.10 | 861.5428 | [M-H]- | 916.06   |
| PI 18:0_18:3 | 3.91 | 859.5308 | [M-H]- | 646.68   |
| PI 16:0_20:4 | 3.79 | 857.5082 | [M-H]- | 499.23   |
| PI 16:0_20:5 | 3.60 | 855.5035 | [M-H]- | 662.58   |
| PI 17:0_20:4 | 3.94 | 871.5325 | [M-H]- | 139.58   |
| PI 17:0_20:5 | 3.75 | 869.5150 | [M-H]- | 140.62   |
| PI 18:0_20:4 | 4.07 | 885.5503 | [M-H]- | 11308.31 |
| PI 18:0_20:5 | 3.90 | 883.5313 | [M-H]- | 9199.45  |
| PI 16:0_22:6 | 3.73 | 881.5121 | [M-H]- | 1944.27  |
| PI 18:0_22:6 | 4.01 | 909.5480 | [M-H]- | 9480.79  |
| PI 18:1_22:6 | 3.77 | 907.5265 | [M-H]- | 464.30   |
| PI 18:2_22:6 | 3.57 | 905.5135 | [M-H]- | 55.89    |
| PI 18:3_22:6 | 3.37 | 903.4938 | [M-H]- | 50.84    |
| PS 16:0_16:1 | 3.83 | 732.4833 | [M-H]- | 165.57   |
| PS 16:0_18:1 | 4.14 | 760.5131 | [M-H]- | 1787.99  |
| PS 16:0_18:2 | 3.93 | 758.4969 | [M-H]- | 331.15   |
| PS 16:0_18:3 | 3.76 | 756.4901 | [M-H]- | 72.35    |
| PS 18:0_18:1 | 4.47 | 788.5557 | [M-H]- | 977.35   |
| PS 18:1_18:1 | 4.21 | 786.5291 | [M-H]- | 1820.32  |
| PS 18:1_18:2 | 3.97 | 784.5103 | [M-H]- | 376.04   |

|                          |      |          |        |          |
|--------------------------|------|----------|--------|----------|
| PS 18:0_20:3             | 4.35 | 812.5366 | [M-H]- | 830.77   |
| PS 18:0_20:4             | 4.18 | 810.5255 | [M-H]- | 1206.61  |
| PS 18:1_20:4             | 3.97 | 808.5118 | [M-H]- | 2672.25  |
| PS 18:2_22:6             | 3.66 | 830.4908 | [M-H]- | 358.38   |
| PS 20:1_22:6             | 4.14 | 860.5317 | [M-H]- | 178.02   |
| PS 20:3_22:6             | 3.73 | 856.5109 | [M-H]- | 55.77    |
| PS 20:5_22:6             | 3.41 | 852.4750 | [M-H]- | 191.17   |
| PS 22:5_22:6             | 3.66 | 880.5156 | [M-H]- | 591.39   |
| PS 22:6_22:6             | 3.55 | 878.4944 | [M-H]- | 838.00   |
| PE P-16:0_16:1           | 5.15 | 674.5063 | [M+H]+ | 323.59   |
| PE P-18:0_16:0           | 6.22 | 704.5496 | [M+H]+ | 124.26   |
| PE P-16:0_18:1           | 5.69 | 702.5345 | [M+H]+ | 3711.20  |
| PE P-18:1_16:1           | 5.28 | 700.5186 | [M+H]+ | 1203.06  |
| PE P-16:0_18:3           | 4.96 | 698.5052 | [M+H]+ | 300.40   |
| PE P-18:1_17:1           | 5.52 | 714.5347 | [M+H]+ | 714.10   |
| PE P-18:0_18:1           | 6.28 | 730.5673 | [M+H]+ | 4389.85  |
| PE P-18:1_18:1           | 5.76 | 728.5520 | [M+H]+ | 9711.33  |
| PE P-18:1_18:2           | 5.35 | 726.5364 | [M+H]+ | 2304.03  |
| PE P-16:0_20:4           | 5.18 | 724.5192 | [M+H]+ | 527.20   |
| PE P-16:0_20:5           | 4.88 | 722.5059 | [M+H]+ | 2043.38  |
| PE P-14:0_22:6           | 4.61 | 720.4905 | [M+H]+ | 101.51   |
| PE P-15:0_22:6           | 4.84 | 734.5046 | [M+H]+ | 105.00   |
| PE P-18:0_20:1           | 6.87 | 758.5972 | [M+H]+ | 200.51   |
| PE P-18:1_20:1           | 6.32 | 756.5801 | [M+H]+ | 489.83   |
| PE P-18:1_20:2           | 5.86 | 754.5692 | [M+H]+ | 290.13   |
| PE P-18:1_20:4/18:0_20:5 | 5.25 | 750.5341 | [M+H]+ | 1543.41  |
| PE P-16:0_22:6           | 5.07 | 748.5243 | [M+H]+ | 12569.40 |
| PE P-17:0_22:6           | 5.31 | 762.5359 | [M+H]+ | 195.75   |
| PE P-18:0_22:5           | 5.77 | 778.5682 | [M+H]+ | 532.68   |
| PE P-18:0_22:6           | 5.58 | 776.5552 | [M+H]+ | 897.65   |
| PE P-18:1_22:6           | 5.13 | 774.5397 | [M+H]+ | 7778.65  |
| PE P-18:2_22:6           | 4.78 | 772.5233 | [M+H]+ | 1107.60  |
